# Supplementary material for: Intravesical administration of combined hyaluronic acid (HA) and chondroitin sulfate (CS) for the treatment of female recurrent urinary tract infections: a European multicentre nested case–control study
Source: PubMed Central journal article supplement — BMJ Open. 2016 Mar 31;6(3):e009669. doi: 10.1136/bmjopen-2015-009669 (PMC4823394; doi:10.1136/bmjopen-2015-009669), 2016-03-31
Supplement: bmjopen-2015-009669supp_table1.pdf [file bmjopen-2015-009669supp_table1.pdf]

**Supplementary Table 1 Health related quality of life assessment before treatment initiation and after 12 months for the HA + CS and standard care group**

|                           | <i>Baseline</i>         | <i>12 months</i> | <i>Baseline</i>               | <i>12 months</i> | <i>P-value</i> |
|---------------------------|-------------------------|------------------|-------------------------------|------------------|----------------|
|                           | <b>HA + CS (N = 79)</b> |                  | <b>Standard care (N = 26)</b> |                  |                |
| EQ-5D 3L<br>Mean (SD)     | 0.53 (0.36)             | 0.76 (0.25)      | 0.57 (0.31)                   | 0.53 (0.40)      | 0.020          |
|                           | <b>HA + CS (N = 83)</b> |                  | <b>Standard care (N = 27)</b> |                  |                |
| EQ-5D<br>VAS<br>Mean (SD) | 59.53 (18.34)           | 75.88 (16.90)    | 62.5 (11.67)                  | 66.84 (14.17)    | <0.001         |
|                           | <b>HA + CS (N = 67)</b> |                  | <b>Standard care (N = 59)</b> |                  |                |
| SF-36 PCS<br>Mean (SD)    | 61.88 (10.14)           | 76.99 (11.69)    | 60.68 (10.02)                 | 74.66 (13.32)    | 0.118          |
| SF-36 MCS<br>Mean (SD)    | 61.74 (10.26)           | 77.35 (11.33)    | 60.68 (10.02)                 | 74.66 (13.32)    | 0.105          |

MCS = Mental component score; PCS = Physical component score; SD = standard deviation; VAS = visual analogue scale
