# Supplementary material for: Intravesical administration of combined hyaluronic acid (HA) and chondroitin sulfate (CS) for the treatment of female recurrent urinary tract infections: a European multicentre nested case–control study
Source: PubMed Central journal article supplement — BMJ Open. 2016 Mar 31;6(3):e009669. doi: 10.1136/bmjopen-2015-009669 (PMC4823394; doi:10.1136/bmjopen-2015-009669), 2016-03-31
Supplement: bmjopen-2015-009669supp_table2.pdf [file bmjopen-2015-009669supp_table2.pdf]

**Supplementary Table 2 Resource consumption before treatment and after 12 months follow-up. Median (IQR)**

| <b>Resources</b>                     | <b>HA + CS<br/>(N=181)</b> | <b>Standard Care<br/>(N=95)</b> | <b>P Value*</b> |
|--------------------------------------|----------------------------|---------------------------------|-----------------|
| N. GP visits <i>Before treatment</i> | 5 (3-6)                    | 3 (3-4)                         | 0.964           |
| <i>Follow-up</i>                     | 2 (1.5-3)                  | 0 (0-1)                         |                 |
| N. Specialist visits                 | 6 (2-10)<br>2 (1-5)        | 6 (4-8)<br>4 (4-4)              | 0.644           |
| N. Urine microscopic analysis        | 5 (3-7)<br>2 (0-3)         | 6 (6-8)<br>4 (1-4)              | 0.219           |
| N. Urine culture                     | 4.5 (3-7)<br>2 (1-4)       | 6 (5-8)<br>1 (0-3)              | <0.001          |
| N. Urine cytology                    | 2 (1-3)<br>1 (1-1)         | 3 (1-3)<br>0 (0-1)              | 0.003           |
| N. Vaginal swab test                 | 3 (1-3)<br>0 (0-0)         | 3 (1-3)<br>0 (0-0)              | 0.809           |
| N. Transabdominal ultrasound         | 2 (1-2)<br>1 (0-1)         | 2 (1-2)<br>0 (0-1)              | 0.091           |
| N. Transvaginal ultrasound           | 1 (1-2)<br>0 (0-0)         | 2 (1-2)<br>0 (0-0)              | 0.938           |
| N. Uroflowmetry                      | 1 (0-1)<br>0 (0-1)         | 0 (0-1)<br>0 (0-1)              | 0.933           |
| N. Invasive urodynamic test          | 1 (1-1)<br>1 (1-1)         | 0 (0-1)<br>0 (0-0)              | 0.777           |
| N. Cystoscopy with bladder biopsy    | 0 (0-1)<br>0 (0-0)         | 0 (0-0)<br>0 (0-0)              | 0.234           |
| N. Cystoscopy                        | 1 (1-3)<br>1 (0-1)         | 1 (0-1)<br>0 (0-1)              | 0.047           |
| N. Antibiotic prescriptions          | -<br>0 (0-1)^              | -<br>1 (0-1)                    | 0.001           |

IQR = Interquartile range

\* Wilcoxon-Mann-Whitney test on the differences in the before treatment/ follow-up resource consumption between the two groups

^ mean (SD), 0.99 (1.85) in HA + CS vs 1.31 (2.47) in Standard care
